# Supplementary material for: Fruit waste-derived carbon dots with rhodamine B for the ratiometric detection of Fe3+ and Cu2+
Source: Royal Society of Chemistry journal article supplement (doi:10.1039/d4ay01539h), 2024-01-01
Supplement: d4ay01539h1.pdf [file d4ay01539h1.pdf]

## Supplementary information

### Fruit Waste-Derived Carbon Dots with Rhodamine B for Ratiometric Detection of Fe<sup>3+</sup> and Cu<sup>2+</sup>

#### Figure list:

**Fig.S1(a)** The fluorescence intensity of CQDs under different reaction times;The fluorescence intensity of CQDs synthesized under different HT temperatures.

**Fig.S2** Zeta potentials of CQDs, RhB and CQDs@RhB.

**Fig.S3** PL emission spectra with different excitation wavelengths from 300 to 430 nm.

**Fig.S4** (a and c) Fluorescence emission spectra of CQDs solution at different concentrations of Fe<sup>3+</sup> and Cu<sup>2+</sup> by 350 nm excitation wavelength. (b and d) Relationship between F/F<sub>0</sub> and the concentration of Fe<sup>3+</sup> and Cu<sup>2+</sup>.

**Fig. S5** (a) PL emission spectra with different excitation wavelengths from 300 to 430 nm of the ratiometric probe. (b) UV-vis spectrum of the ratiometric probe.

**Fig. S6** Effect of pH values on rhodamine B.

**Fig. S7** Relationship between F<sub>446</sub>/F<sub>579</sub> and the concentration of Fe<sup>3+</sup>.

**Fig. S8** Relationship between F<sub>446</sub>/F<sub>579</sub> and the concentration of Cu<sup>2+</sup>.

**Fig. S9** (a) Fluorescence recovery of ratiometric probes quenched by different concentration of Fe<sup>3+</sup> and Cu<sup>2+</sup>; (b) Fluorescence recovery of ratiometric probes quenched by different concentration of Cu<sup>2+</sup> and Fe<sup>3+</sup>; (c and d) Linear relationship between (F<sub>4461</sub>-F<sub>4462</sub>)/(F<sub>5791</sub>-F<sub>5792</sub>) and the concentration of Fe<sup>3+</sup> and Cu<sup>2+</sup>.

#### Table list:

**Table. S1** F/F<sub>0</sub> under pH 6.0 in the presence of metal ions (0.1 mol•L<sup>-1</sup>).

**Table. S2.** spiked recovery of ratiometric probes in different real water samples.

**Table. S3.** Comparison of the LOD for the detection of Fe<sup>3+</sup> and Cu<sup>2+</sup> with the earlier literature reports.

## Supplementary information

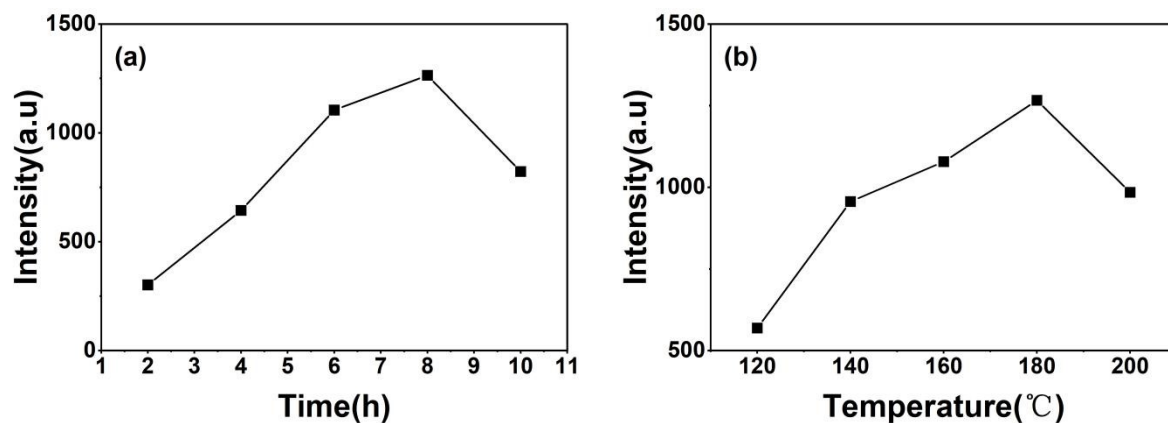

**Fig.S1**(a) The fluorescence intensity of CQDs under different reaction times (concentrations of CQDs were different for each point during measurement). (b) The fluorescence intensity of CQDs synthesized under different HT temperatures (concentrations of CQDs were different for each point during measurement)

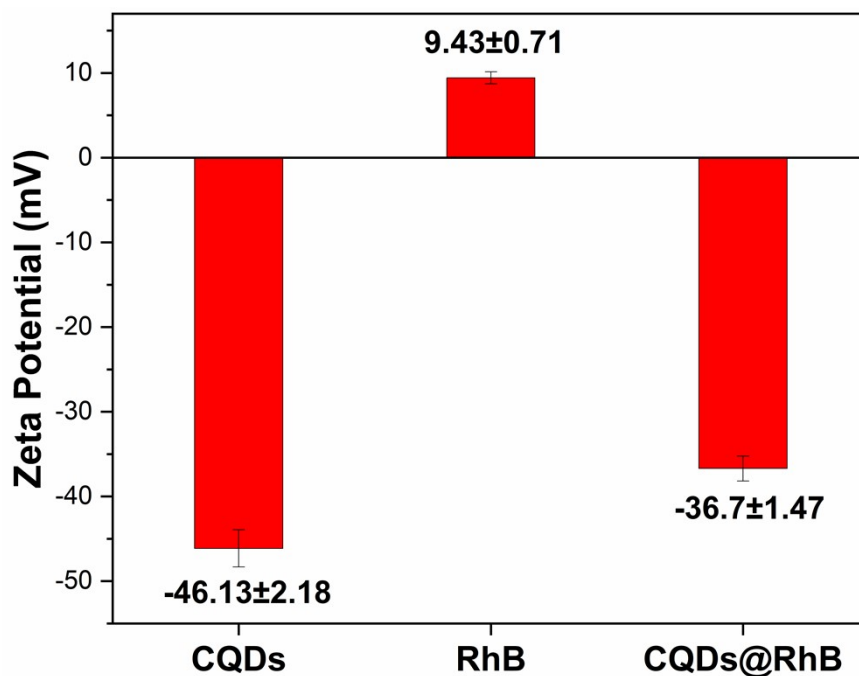

**Fig.S2** Zeta potentials of CQDs, RhB and CQDs@RhB.

## Supplementary information

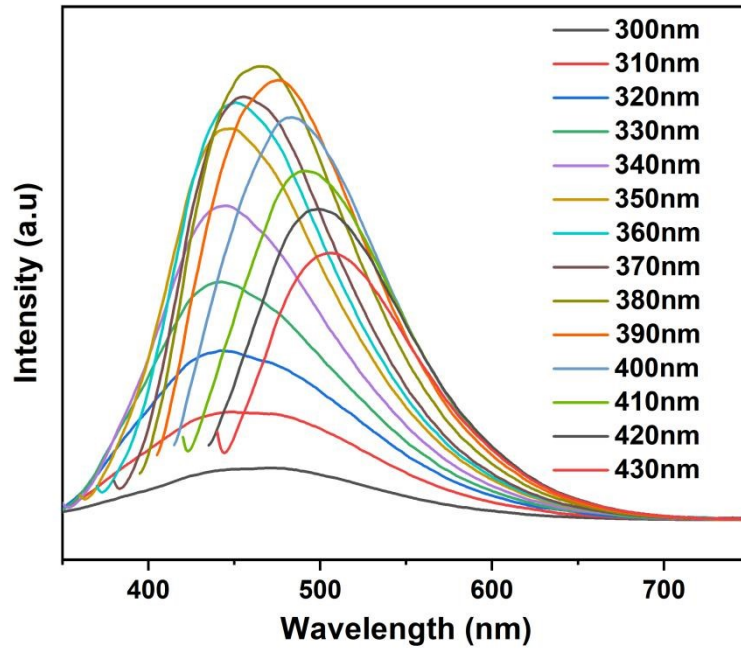

Fig.S3 PL emission spectra with different excitation wavelengths from 300 to 430 nm.

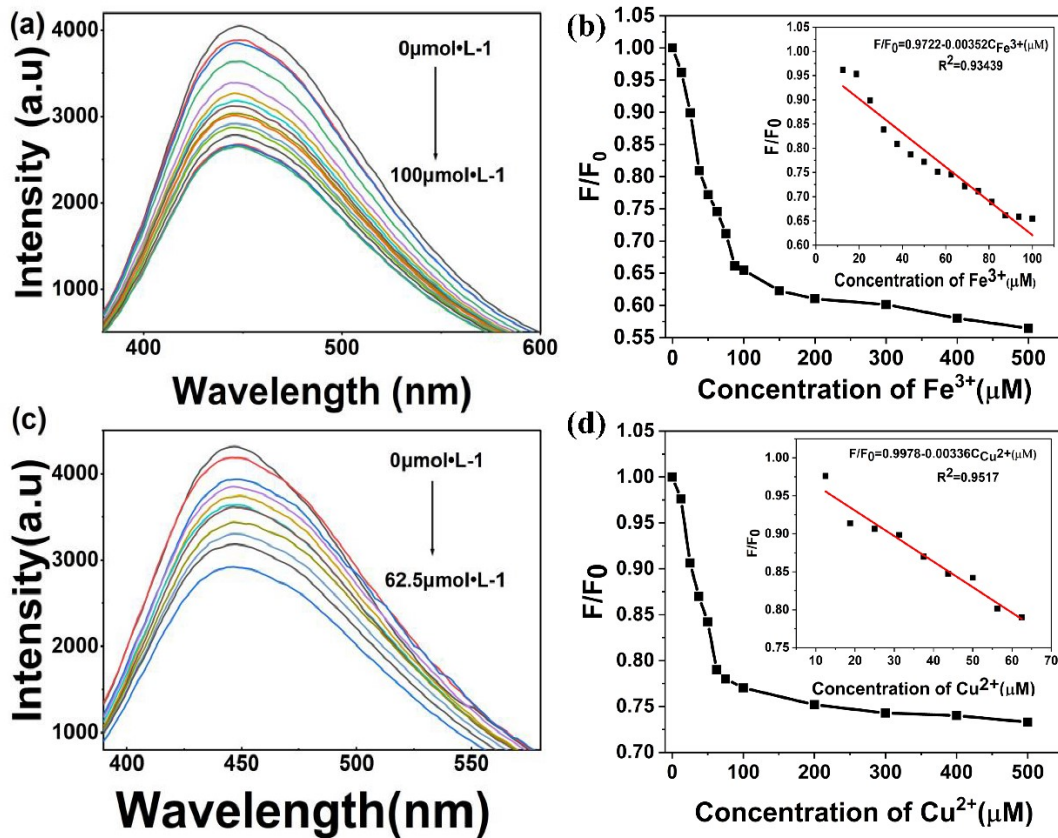

Fig.S4 (a and c) Fluorescence emission spectra of CQDs solution at different concentrations of  $\text{Fe}^{3+}$  and  $\text{Cu}^{2+}$  by 350 nm excitation wavelength. (b and d) Relationship between  $F/F_0$  and the concentration of  $\text{Fe}^{3+}$  and  $\text{Cu}^{2+}$ .

## Supplementary information

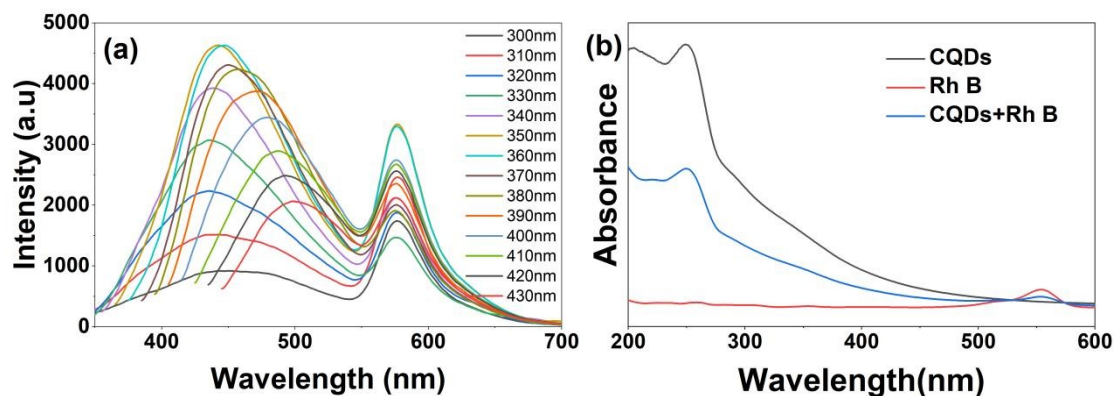

Fig. S5 (a) PL emission spectra with different excitation wavelengths from 300 to 430 nm of the ratiometric probe. (b) UV-vis spectrum of the ratiometric probe.

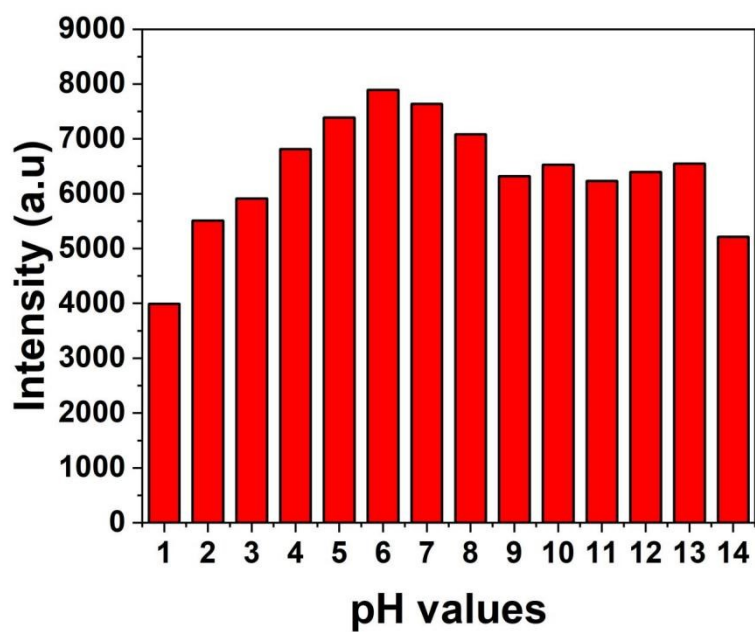

Fig. S6. Effect of pH values on rhodamine B.

## Supplementary information

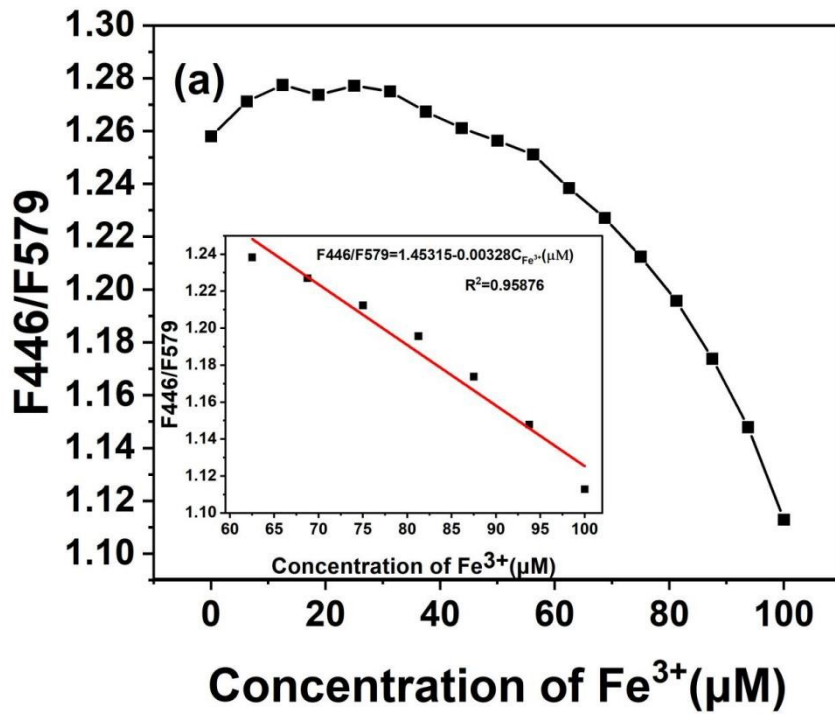

Fig. S7. Relationship between  $F_{446}/F_{579}$  and the concentration of  $Fe^{3+}$

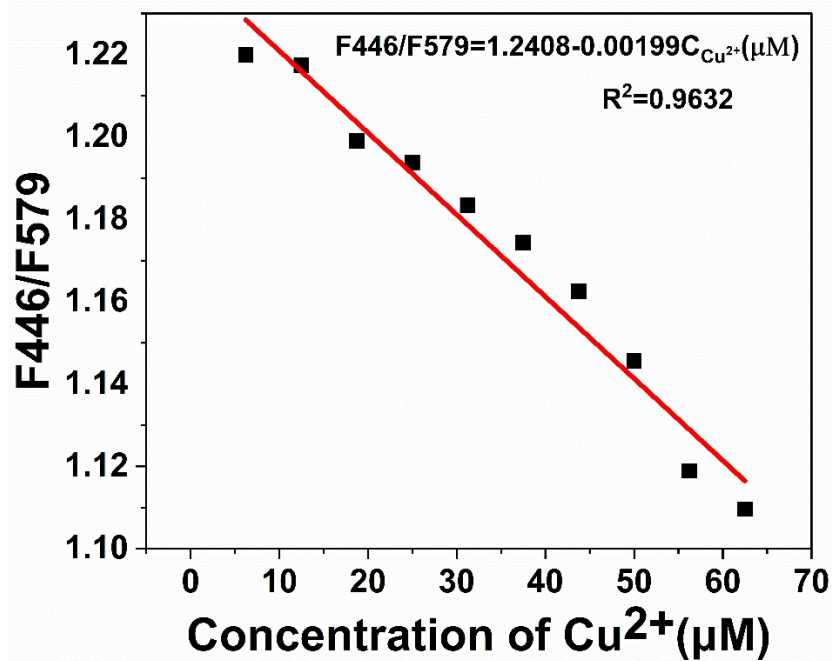

Fig. S8. Relationship between  $F_{446}/F_{579}$  and the concentration of  $Cu^{2+}$

## Supplementary information

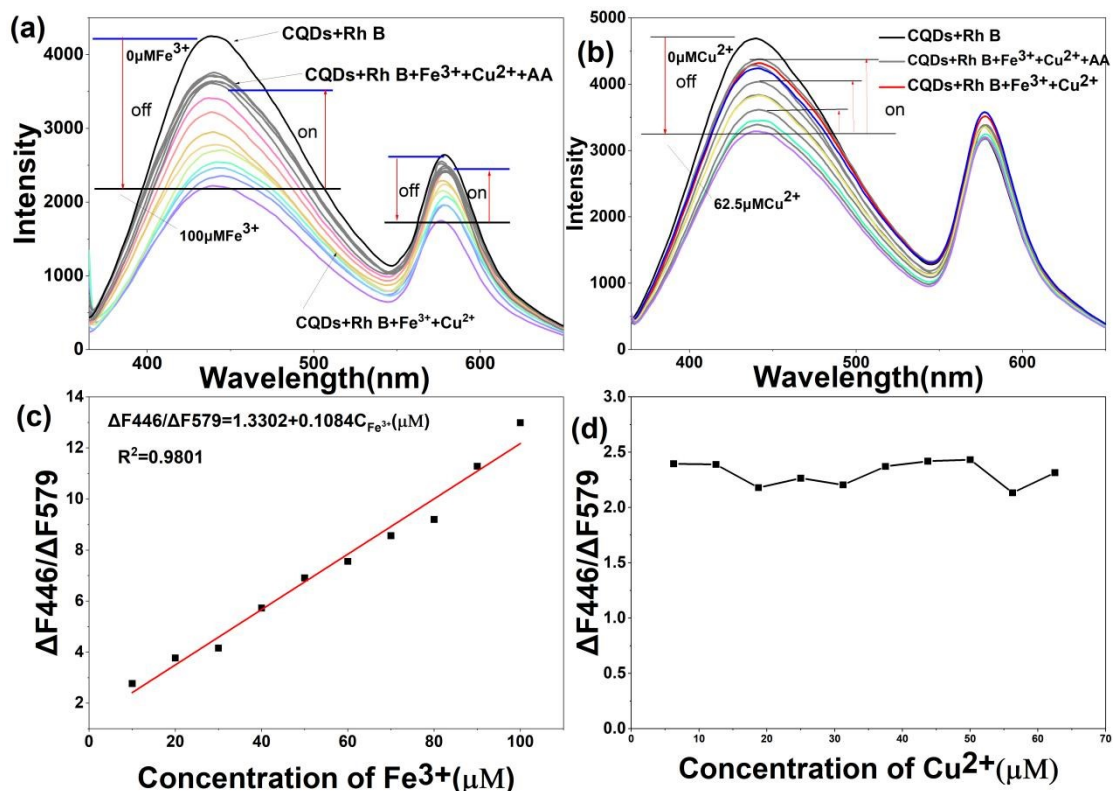

**Fig. S9** (a) Fluorescence recovery of ratiometric probes quenched by different concentration of  $\text{Fe}^{3+}$  (0-100  $\mu\text{M}$ ) and  $\text{Cu}^{2+}$  (25  $\mu\text{M}$ ) (b) Fluorescence recovery of ratiometric probes quenched by different concentration of  $\text{Cu}^{2+}$  (0-62.5  $\mu\text{M}$ ) and  $\text{Fe}^{3+}$  (40  $\mu\text{M}$ ) (c and d) Linear relationship between  $(F_{446}^1 - F_{446}^2) / (F_{579}^1 - F_{579}^2)$  and the concentration of  $\text{Fe}^{3+}$  and  $\text{Cu}^{2+}$ .

**Table. S1.**  $F/F_0$  under pH 6.0 in the presence of metal ions (0.1 mol·L<sup>-1</sup>).

| Ions and amino acids | $F/F_0$ |
|----------------------|---------|
| $\text{Fe}^{3+}$     | 0.490   |
| $\text{Cu}^{2+}$     | 0.635   |
| $\text{Na}^+$        | 1.001   |
| $\text{Mg}^{2+}$     | 0.905   |
| $\text{Mn}^{2+}$     | 0.960   |
| $\text{Ca}^{2+}$     | 1.036   |
| $\text{Fe}^{2+}$     | 0.802   |
| $\text{Cd}^{2+}$     | 0.993   |
| $\text{Ag}^+$        | 0.949   |

## Supplementary information

**Table. S2.** spiked recovery of ratiometric probes in different real water samples.

| Ions                   | Sample         | Original<br>( $\mu\text{M}$ ) | Added ( $\mu\text{M}$ ) | *Found ( $\mu\text{M}$ ) |       |       | Recovery (%) | RSD%(n=3) |
|------------------------|----------------|-------------------------------|-------------------------|--------------------------|-------|-------|--------------|-----------|
| <b>Fe<sup>3+</sup></b> | Tap<br>water   | 14.52                         | 2.00                    | 2.27                     | 2.25  | 2.28  | 113.33       | 0.67      |
|                        |                |                               | 4.00                    | 3.97                     | 3.90  | 4.01  | 99.00        | 1.41      |
|                        |                |                               | 6.00                    | 5.53                     | 5.59  | 5.51  | 92.39        | 0.75      |
|                        |                |                               | 12.00                   | 12.16                    | 12.09 | 12.56 | 102.25       | 2.07      |
|                        |                |                               | 24.00                   | 23.89                    | 23.22 | 23.65 | 98.28        | 1.44      |
|                        | River<br>water | 23.58                         | 2.00                    | 2.15                     | 2.21  | 2.03  | 106.5        | 4.30      |
|                        |                |                               | 4.00                    | 3.59                     | 3.48  | 3.63  | 89.17        | 2.18      |
|                        |                |                               | 6.00                    | 5.16                     | 5.23  | 5.19  | 86.56        | 0.68      |
|                        |                |                               | 12.00                   | 12.39                    | 12.15 | 11.83 | 101.03       | 2.32      |
|                        |                |                               | 24.00                   | 24.87                    | 23.52 | 22.95 | 99.08        | 4.15      |
| <b>Cu<sup>2+</sup></b> | Tap<br>water   | 0.35                          | 1.00                    | 1.09                     | 1.07  | 1.12  | 109.33       | 2.30      |
|                        |                |                               | 2.00                    | 1.87                     | 1.79  | 1.95  | 93.50        | 4.28      |
|                        |                |                               | 3.00                    | 2.65                     | 2.55  | 2.79  | 88.78        | 4.53      |
|                        | River<br>water | 1.85                          | 1.00                    | 1.14                     | 1.06  | 1.15  | 111.67       | 4.42      |
|                        |                |                               | 2.00                    | 1.95                     | 1.70  | 2.09  | 95.67        | 10.33     |
|                        |                |                               | 3.00                    | 2.57                     | 2.47  | 2.98  | 89.11        | 10.11     |

\*: Found ( $\mu\text{M}$ ) This column of data has been deducted from the original concentration.

## Supplementary information

**Table. S3.** Comparison of the LOD for the detection of Fe<sup>3+</sup> and Cu<sup>2+</sup> with the earlier literature reports.

| Materials          | Analytes         | Linear range ( $\mu\text{mol}\cdot\text{L}^{-1}$ ) | LODs ( $\mu\text{mol}\cdot\text{L}^{-1}$ ) | Refs                         |
|--------------------|------------------|----------------------------------------------------|--------------------------------------------|------------------------------|
| CQDs-C             | Fe <sup>3+</sup> | 0~500                                              | 5.23                                       | (Ding et al., 2021)          |
| CQDs               | Fe <sup>3+</sup> | 10~100                                             | 2.10                                       | (Nagaraj et al., 2022)       |
| CQDs               | Fe <sup>3+</sup> | 0~45                                               | 2.5                                        | (Siahcheshm & Heiden, 2023)  |
| OP-CQDs-FA system  | Fe <sup>3+</sup> | 5~80                                               | 4.91                                       | (Zhao et al., 2023)          |
| N-CQDs             | Fe <sup>3+</sup> | 3~100                                              | 3                                          | (Gu et al., 2022)            |
| Ni-CQDs            | Cu <sup>2+</sup> | 300~900                                            | 7.88                                       | (Sun et al., 2023)           |
| Nitrogen-CQDs      | Cu <sup>2+</sup> | 0~280                                              | 4.74                                       | (X. Liu et al., 2020)        |
| N-CQDs             | Cu <sup>2+</sup> | 10~1000                                            | 0.455                                      | (G. Liu et al., 2018)        |
| NBU-CDs            | Cu <sup>2+</sup> | 0.5~5                                              | 0.83                                       | (Cui et al., 2023)           |
| CQD                | Cu <sup>2+</sup> | 0~400                                              | 0.42                                       | (Kamarol Zaman et al., 2021) |
| ratiometric probes | Fe <sup>3+</sup> | 0~100                                              | 1.75                                       | This work                    |
|                    | Cu <sup>2+</sup> | 0~62.5                                             | 0.43                                       |                              |



# Supplementary information

## References

- Cui, X., Zhang, Y., Chen, Z., Xiao, H., Xiong, R., & Huang, C. (2023). Xylan derived carbon dots composite with PCL/PLA for construction biomass nanofiber membrane used as fluorescence sensor for detection Cu<sup>2+</sup> in real samples. *International Journal of Biological Macromolecules*, 252, 126431. <https://doi.org/10.1016/j.ijbiomac.2023.126431>
- Ding, S., Gao, Y., Ni, B., & Yang, X. (2021). Green synthesis of biomass-derived carbon quantum dots as fluorescent probe for Fe<sup>3+</sup> detection. *Inorganic Chemistry Communications*, 130, 108636. <https://doi.org/10.1016/j.inoche.2021.108636>
- Gu, L., Zhang, J., Yang, G., Tang, Y., Zhang, X., Huang, X., Zhai, W., Fodjo, E. K., & Kong, C. (2022). Green preparation of carbon quantum dots with wolfberry as on-off-on nanosensors for the detection of Fe<sup>3+</sup> and l-ascorbic acid. *Food Chemistry*, 376, 131898. <https://doi.org/10.1016/j.foodchem.2021.131898>
- Kamarol Zaman, A. S., Tan, T. L., A/P Chowmasundaram, Y., Jamaludin, N., Sadrolhosseini, A. R., Rashid, U., & Rashid, S. A. (2021). Properties and molecular structure of carbon quantum dots derived from empty fruit bunch biochar using a facile microwave-assisted method for the detection of Cu<sup>2+</sup> ions. *Optical Materials*, 112, 110801. <https://doi.org/10.1016/j.optmat.2021.110801>
- Liu, G., Li, X., Yu, Z., Ren, P., Yang, F., Wang, J., & Song, Y. (2018). Nonenzymatic detection of glucose based on Cu<sup>2+</sup> catalytic oxidation on N-doped carbon quantum dots. *Journal of Physics and Chemistry of Solids*, 123, 344–354. <https://doi.org/10.1016/j.jpics.2018.08.025>
- Liu, X., Zhang, S., Xu, H., Wang, R., Dong, L., Gao, S., Tang, B., Fang, W., Hou, F., Zhong, L., & Aldalbah, A. (2020). Nitrogen-Doped Carbon Quantum Dots from Poly(ethyleneimine) for Optical Dual-Mode Determination of Cu<sup>2+</sup> and L-Cysteine and Their Logic Gate Operation. *ACS Applied Materials & Interfaces*, 12(42), 47245–47255. <https://doi.org/10.1021/acsami.0c12750>
- Nagaraj, M., Ramalingam, S., Murugan, C., Aldawood, S., Jin, J.-O., Choi, I., & Kim, M. (2022). Detection of Fe<sup>3+</sup> ions in aqueous environment using fluorescent carbon quantum dots synthesized from endosperm of *Borassus flabellifer*. *Environmental Research*, 212, 113273. <https://doi.org/10.1016/j.envres.2022.113273>
- Siahcheshm, P., & Heiden, P. (2023). High quantum yield carbon quantum dots as selective fluorescent turn-off probes for dual detection of Fe<sup>2+</sup>/Fe<sup>3+</sup> ions. *Journal of Photochemistry and Photobiology A: Chemistry*, 435, 114284. <https://doi.org/10.1016/j.jphotochem.2022.114284>
- Sun, S., Sun, Y., Yang, F., Che, S., Zhang, X., Zhang, G., & Li, Y. (2023). Electrochemical synthesis of Ni doped carbon quantum dots for simultaneous fluorometric determination of Fe<sup>3+</sup> and Cu<sup>2+</sup> ion facilely. *Green Chemical Engineering*, 4(1), 115–122. <https://doi.org/10.1016/j.gce.2022.05.004>
- Zhao, Q., Mao, H.-H., Xue, M., Feng, X.-Z., Han, G.-C., Chen, Z., & Kraatz, H.-B. (2023). One-pot synthesis of environmentally-friendly carbon quantum dots for “on-off” rapid fluorescent sensing of folic acid, Fe<sup>3+</sup>, and Ca<sup>2+</sup>. *Journal of Luminescence*, 263, 120091. <https://doi.org/10.1016/j.jlumin.2023.120091>
